# Supplementary material
Source: MDPI journal article supplement (https://www.mdpi.com/search?q=molbank-2023-M1566)
Supplement: s002 [file molbank-2023-M1566-s002-mod.mol]

4-Ad-1-Ipr-imidazole-2-methanol.mol
  corina  01232312453D 1   1.00000     0.00000 
CORINA 4.4.0 0026  12.08.2021
 20 23  0  0  0  0  0  0  0  0999 V2000
   -1.2894    2.7935    2.9324 C   0  0  0  0  0  0  0  0  0  0  0  0
   -2.0698    1.6965    2.9649 C   0  0  0  0  0  0  0  0  0  0  0  0
   -1.7078    0.9211    1.8965 N   0  0  0  0  0  0  0  0  0  0  0  0
   -0.7181    1.5718    1.2479 C   0  0  0  0  0  0  0  0  0  0  0  0
   -0.4698    2.6885    1.8759 N   0  0  0  0  0  0  0  0  0  0  0  0
   -2.2858   -0.3731    1.5262 C   0  0  0  0  0  0  0  0  0  0  0  0
   -2.0863   -1.3673    2.6719 C   0  0  0  0  0  0  0  0  0  0  0  0
   -3.7815   -0.2040    1.2522 C   0  0  0  0  0  0  0  0  0  0  0  0
   -0.1019    5.9454    4.7539 C   0  0  0  0  0  0  0  0  0  0  0  0
   -0.1720    5.3923    6.1787 C   0  0  0  0  0  0  0  0  0  0  0  0
   -1.4358    4.5440    6.3348 C   0  0  0  0  0  0  0  0  0  0  0  0
   -2.6677    5.4094    6.0625 C   0  0  0  0  0  0  0  0  0  0  0  0
   -2.5976    5.9626    4.6377 C   0  0  0  0  0  0  0  0  0  0  0  0
   -1.3339    6.8108    4.4815 C   0  0  0  0  0  0  0  0  0  0  0  0
   -0.0635    4.7848    3.7576 C   0  0  0  0  0  0  0  0  0  0  0  0
   -2.5592    4.8020    3.6414 C   0  0  0  0  0  0  0  0  0  0  0  0
   -1.3272    3.9366    3.9137 C   0  0  0  0  0  0  0  0  0  0  0  0
   -1.3974    3.3835    5.3385 C   0  0  0  0  0  0  0  0  0  0  0  0
   -0.0127    1.0858    0.0080 C   0  0  0  0  0  0  0  0  0  0  0  0
   -0.7038    1.5592   -1.1497 O   0  0  0  0  0  0  0  0  0  0  0  0
  1  2  2  0      
  2  3  1  0      
  3  4  1  0      
  4  5  2  0      
  5  1  1  0      
  3  6  1  0      
  6  7  1  0      
  6  8  1  0      
  9 10  1  0      
 10 11  1  0      
 11 12  1  0      
 12 13  1  0      
 13 14  1  0      
 14  9  1  0      
  9 15  1  0      
 13 16  1  0      
 15 17  1  0      
 17 16  1  0      
 17 18  1  0      
 18 11  1  0      
 17  1  1  0      
  4 19  1  0      
 19 20  1  0      
M  END
$$$$
