# Supplementary material
Source: MDPI journal article supplement (https://www.mdpi.com/search?q=molbank-2023-M1566)
Supplement: s002 [file molbank-2023-M1566-s002.inchi]

InChI=1S/C17H26N2O/c1-11(2)19-9-15(18-16(19)10-20)17-6-12-3-13(7-17)5-14(4-12)8-17/h9,11-14,20H,3-8,10H2,1-2H3
AuxInfo=1/0/N:7,8,10,12,14,18,15,16,2,19,6,11,9,13,1,4,17,5,3,20/E:(1,2)(3,4,5)(6,7,8)(12,13,14)/rA:20CCNCNCCCCCCCCCCCCCCO/rB:d1;s2;s3;s1d4;s3;s6;s6;;s9;s10;s11;s12;s9s13;s9;s13;s1s15s16;s11s17;s4;s19;/rC:.0073,-.266,0;1.5433,-.3774,0;2.124,1.049,0;.9469,2.0419,0;-.3613,1.2292,0;3.6191,1.4176,0;4.708,.3287,0;4.0177,2.9051,0;-3.2617,-1.9172,0;-4.708,-2.446,0;-3.3009,-3.0714,0;-2.4299,-4.3519,0;-.9834,-3.8233,0;-2.3907,-3.1975,0;-2.2736,-.736,0;.0047,-2.6421,0;-.854,-1.2872,0;-2.3004,-1.816,0;.9469,3.5819,0;-.3868,4.3519,0;
