# Supplementary material
Source: MDPI journal article supplement (https://www.mdpi.com/search?q=molbank-2023-M1566)
Supplement: s002 [file molbank-2023-M1566-s002.mol]

4-Ad-1-Ipr-imidazole-2-methanol.mol
  ChemDraw01052310002D

 20 23  0  0  0  0  0  0  0  0999 V2000
    0.0039   -0.1420    0.0000 C   0  0  0  0  0  0  0  0  0  0  0  0
    0.8239   -0.2015    0.0000 C   0  0  0  0  0  0  0  0  0  0  0  0
    1.1339    0.5600    0.0000 N   0  0  0  0  0  0  0  0  0  0  0  0
    0.5055    1.0901    0.0000 C   0  0  0  0  0  0  0  0  0  0  0  0
   -0.1929    0.6562    0.0000 N   0  0  0  0  0  0  0  0  0  0  0  0
    1.9321    0.7568    0.0000 C   0  0  0  0  0  0  0  0  0  0  0  0
    2.5134    0.1755    0.0000 C   0  0  0  0  0  0  0  0  0  0  0  0
    2.1449    1.5509    0.0000 C   0  0  0  0  0  0  0  0  0  0  0  0
   -1.7413   -1.0235    0.0000 C   0  0  0  0  0  0  0  0  0  0  0  0
   -2.5134   -1.3058    0.0000 C   0  0  0  0  0  0  0  0  0  0  0  0
   -1.7622   -1.6397    0.0000 C   0  0  0  0  0  0  0  0  0  0  0  0
   -1.2972   -2.3233    0.0000 C   0  0  0  0  0  0  0  0  0  0  0  0
   -0.5250   -2.0411    0.0000 C   0  0  0  0  0  0  0  0  0  0  0  0
   -1.2763   -1.7070    0.0000 C   0  0  0  0  0  0  0  0  0  0  0  0
   -1.2138   -0.3929    0.0000 C   0  0  0  0  0  0  0  0  0  0  0  0
    0.0025   -1.4105    0.0000 C   0  0  0  0  0  0  0  0  0  0  0  0
   -0.4559   -0.6872    0.0000 C   0  0  0  0  0  0  0  0  0  0  0  0
   -1.2281   -0.9695    0.0000 C   0  0  0  0  0  0  0  0  0  0  0  0
    0.5055    1.9122    0.0000 C   0  0  0  0  0  0  0  0  0  0  0  0
   -0.2065    2.3233    0.0000 O   0  0  0  0  0  0  0  0  0  0  0  0
  1  2  2  0      
  2  3  1  0      
  3  4  1  0      
  4  5  2  0      
  5  1  1  0      
  3  6  1  0      
  6  7  1  0      
  6  8  1  0      
  9 10  1  0      
 10 11  1  0      
 11 12  1  0      
 12 13  1  0      
 13 14  1  0      
 14  9  1  0      
  9 15  1  0      
 13 16  1  0      
 15 17  1  0      
 17 16  1  0      
 17 18  1  0      
 18 11  1  0      
 17  1  1  0      
  4 19  1  0      
 19 20  1  0      
M  END
